# Supplementary material for: Analysis of the Gut Microbiome and Dietary Habits in Metastatic Melanoma Patients with a Complete and Sustained Response to Immunotherapy
Source: MDPI journal article supplement (doi:10.3390/cancers15113052), 2023-06-04
Supplement: s1 [file s1]

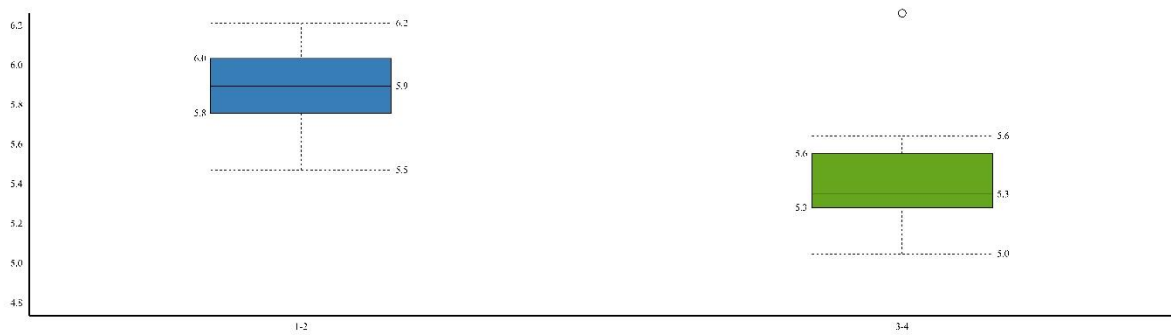

Supplementary Figure S1: A box plot showing the difference in alpha-diversity (Shannon) between metastatic melanoma patients with sustained complete response on immunotherapy, based on the initial number of metastatic sites ( $p < 0.05$ ). Green = patients with 3+ metastatic sites, blue = patients with 1-2 metastatic sites.

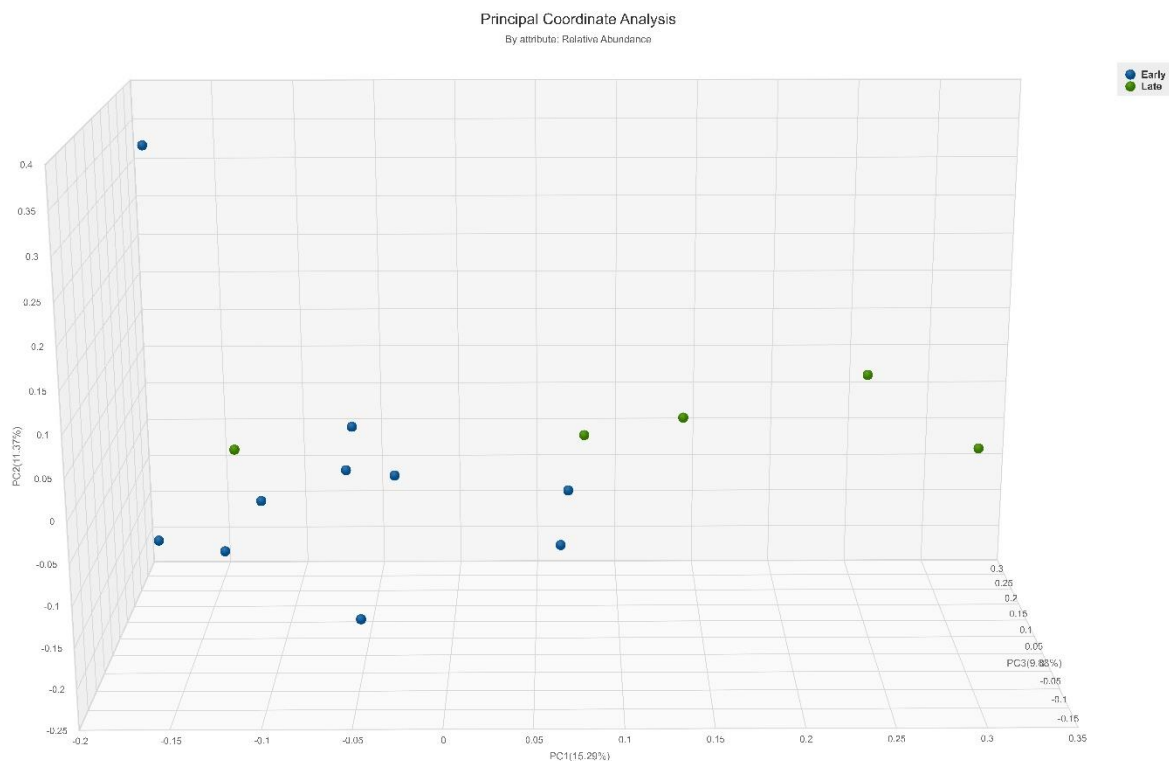

Supplementary Figure S2: A principal coordinate analysis graph (Jaccard) showing the difference in beta-diversity between metastatic melanoma patients who required more or less than 9 months to achieve complete response on immunotherapy ( $p = 0.02$ ). Green = late responders, blue = early responders.

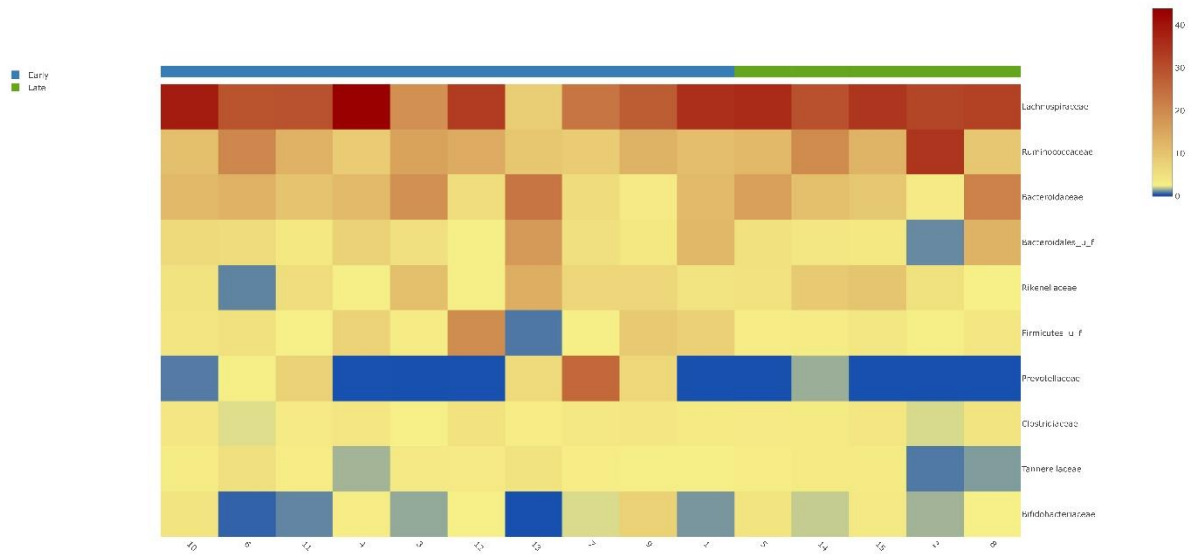

Supplement Figure S3: A heatmap view of the difference in abundance score of the phylum level for all patients, divided to early and late responders, based on whether the complete response to immunotherapy occurred before or after 9 months since the start of immunotherapy. Green = late responders, blue = early responders.

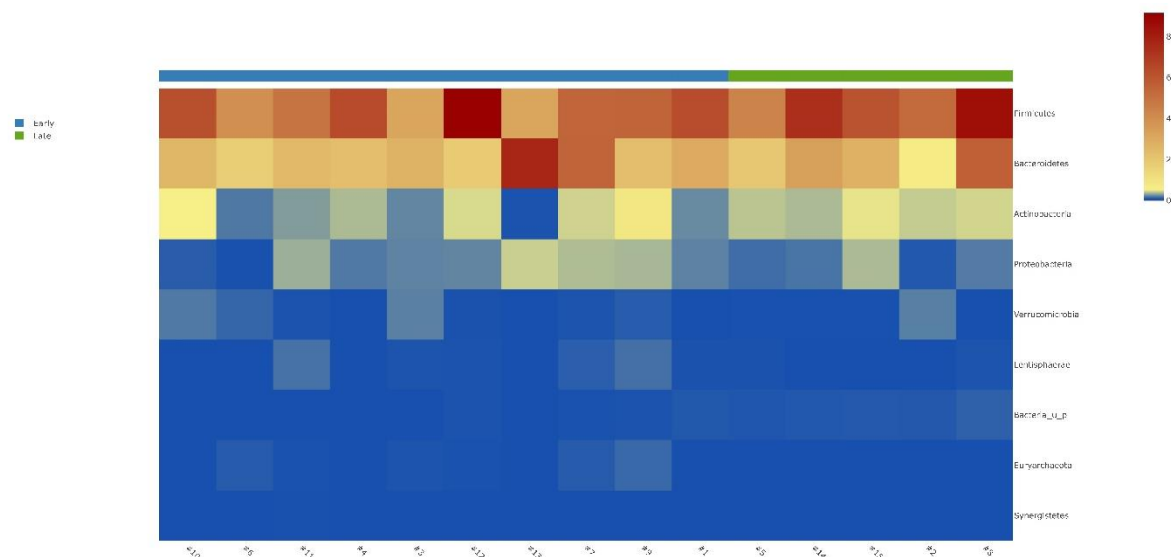

Supplement Figure S4: A stacked bar view of the difference in relative abundance of the phylum level for all patients, divided to early and late responders, based on whether the complete response to immunotherapy occurred before or after 9 months since the start of immunotherapy.

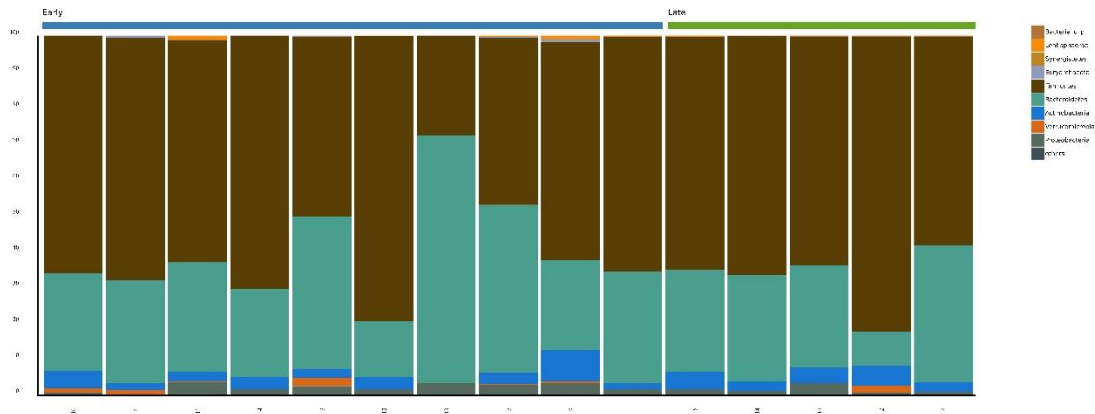

Supplement Figure S5: A heatmap view of the difference in relative abundance of the ten most common bacterial families for all patient cohort, divided to early and late responders, based on whether the complete response to immunotherapy occurred before or after 9 months since the start of immunotherapy. Green = late responders, blue = early responders.

| Supplementary Table S1: Differences between metastatic melanoma patients with sustained complete response to immunotherapy depending on the time-to-response (demographics and habits) |                 |                  |         |
|----------------------------------------------------------------------------------------------------------------------------------------------------------------------------------------|-----------------|------------------|---------|
| Parameter                                                                                                                                                                              | Late responders | Early responders | p-value |
| Gender                                                                                                                                                                                 |                 |                  |         |
| Female (%)                                                                                                                                                                             | 1 (33.3)        | 2 (66.6)         | 0.4936  |
| Male (%)                                                                                                                                                                               | 4 (33.3)        | 8 (66.6)         |         |
| Marital status                                                                                                                                                                         |                 |                  |         |
| Married (%)                                                                                                                                                                            | 3 (30)          | 7 (70)           | 0.846   |
| Not married (%)                                                                                                                                                                        | 2 (40)          | 3 (60)           |         |
| Weekly hours spend socializing                                                                                                                                                         |                 |                  |         |
| 1 (%)                                                                                                                                                                                  | 1 (50)          | 1 (50)           | 0.8740  |
| 2-5 (%)                                                                                                                                                                                | 1 (50)          | 1 (50)           |         |
| 5-10 (%)                                                                                                                                                                               | 2 (28.6)        | 5 (71.4)         |         |
| 11-20 (%)                                                                                                                                                                              | 1 (25.0)        | 3 (75.0)         |         |
| Highest education level                                                                                                                                                                |                 |                  |         |
| Elementary school (%)                                                                                                                                                                  | 1 (100)         | 0 (0)            | 0.2451  |
| High school (%)                                                                                                                                                                        | 3 (37.5)        | 5 (62.5)         |         |
| Higher education (%)                                                                                                                                                                   | 1 (16.7)        | 5 (83.3)         |         |
| Professional status                                                                                                                                                                    |                 |                  |         |
| Retired (%)                                                                                                                                                                            | 5 (41.7)        | 7 (58.3)         | 0.4936  |
| Working (%)                                                                                                                                                                            | 0 (0)           | 3 (100)          |         |
| Breastfed                                                                                                                                                                              |                 |                  |         |
| No (%)                                                                                                                                                                                 | 1 (50)          | 1 (50)           | 0.7327  |
| Yes (%)                                                                                                                                                                                | 4 (33.3)        | 8 (66.7)         |         |
| Smoking status                                                                                                                                                                         |                 |                  |         |
| Non-smoker (%)                                                                                                                                                                         | 4 (40)          | 6 (60)           | 0.8465  |
| Smoker (%)                                                                                                                                                                             | 1 (20)          | 4 (80)           |         |
| Prescription drug use                                                                                                                                                                  |                 |                  |         |
| No (%)                                                                                                                                                                                 | 0 (0)           | 2 (100)          | 0.7883  |
| Yes (%)                                                                                                                                                                                | 5 (38.5)        | 8 (61.5)         |         |
| Blood pressure drug use                                                                                                                                                                |                 |                  |         |
| No (%)                                                                                                                                                                                 | 2 (33.3)        | 4 (66.7)         | 0.5762  |
| Yes (%)                                                                                                                                                                                | 3 (38.5)        | 6 (61.5)         |         |
| Antidiabetic drugs                                                                                                                                                                     |                 |                  |         |

|                                                                                                                                          |          |          |        |
|------------------------------------------------------------------------------------------------------------------------------------------|----------|----------|--------|
| No (%)                                                                                                                                   | 4 (33.3) | 8 (66.7) | 0.4936 |
| Yes (%)                                                                                                                                  | 1 (33.3) | 2 (66.7) |        |
| Thyroid drug use                                                                                                                         |          |          |        |
| No (%)                                                                                                                                   | 4 (30.8) | 9 (69.2) | 0.7883 |
| Yes (%)                                                                                                                                  | 1 (50)   | 1 (50)   |        |
| Corticosteroid use                                                                                                                       |          |          |        |
| No (%)                                                                                                                                   | 4 (30.8) | 9 (69.2) | 0.7883 |
| Yes (%)                                                                                                                                  | 1 (50)   | 1 (50)   |        |
| Hypolipemic use                                                                                                                          |          |          |        |
| No (%)                                                                                                                                   | 5 (41.7) | 7 (58.3) | 0.4936 |
| Yes (%)                                                                                                                                  | 0 (0)    | 3 (100)  |        |
| Previous use of supplements                                                                                                              |          |          |        |
| No (%)                                                                                                                                   | 3 (30)   | 7 (70)   | 0.8465 |
| Yes (%)                                                                                                                                  | 2 (40)   | 3 (60)   |        |
| Average daily sleep                                                                                                                      |          |          |        |
| >9 hours (%)                                                                                                                             | 0 (0)    | 1 (100)  | 0.4966 |
| 7-8 hours (%)                                                                                                                            | 4 (44.4) | 5 (55.6) |        |
| 4-6 hours (%)                                                                                                                            | 1 (20)   | 4 (80)   |        |
| The cut-off for late responders was 9 or more months to reach complete response. Bolded values denote statistical significance (p<0.05). |          |          |        |

| Supplementary Table S2: Differences between metastatic melanoma patients with sustained complete response to immunotherapy depending on the time-to-response (disease, treatment, and response) |                     |                    |                   |
|-------------------------------------------------------------------------------------------------------------------------------------------------------------------------------------------------|---------------------|--------------------|-------------------|
| Parameter                                                                                                                                                                                       | Late responders     | Early responders   | p-value           |
| BRAF mutation status                                                                                                                                                                            |                     |                    |                   |
| Negative                                                                                                                                                                                        | 4 (40%)             | 6 (60%)            | 0.8465            |
| Positive                                                                                                                                                                                        | 1 (20%)             | 4 (80%)            |                   |
| Initial melanoma T stage                                                                                                                                                                        |                     |                    |                   |
| 2a                                                                                                                                                                                              | 0 (0%)              | 1 (100%)           | 0.3787            |
| 2b                                                                                                                                                                                              | 0 (0%)              | 1 (100%)           |                   |
| 3a                                                                                                                                                                                              | 0 (0%)              | 3 (100%)           |                   |
| 3b                                                                                                                                                                                              | 0 (0%)              | 2 (100%)           |                   |
| 4a                                                                                                                                                                                              | 2 (66.7%)           | 1 (50%)            |                   |
| 4b                                                                                                                                                                                              | 2 (66.7%)           | 1 (50%)            |                   |
| Unknown                                                                                                                                                                                         | 1 (50%)             | 1 (50%)            |                   |
| Initial melanoma N stage                                                                                                                                                                        |                     |                    |                   |
| 0                                                                                                                                                                                               | 1 (20%)             | 4 (80%)            | 0.6769            |
| 1a                                                                                                                                                                                              | 1 (33.3%)           | 2 (60.7%)          |                   |
| 1c                                                                                                                                                                                              | 1 (100%)            | 0 (0%)             |                   |
| 1 – unspecified                                                                                                                                                                                 | 1 (33.3%)           | 2 (66.7%)          |                   |
| 2                                                                                                                                                                                               | 0 (0%)              | 1 (100%)           |                   |
| Unknown                                                                                                                                                                                         | 1 (50%)             | 1 (50%)            |                   |
| Type of immunotherapy received                                                                                                                                                                  |                     |                    |                   |
| Dual                                                                                                                                                                                            | 1 (33.3%)           | 2 (66.7%)          | 0.4936            |
| Mono                                                                                                                                                                                            | 4 (33.3%)           | 8 (66.7%)          |                   |
| Line of immunotherapy                                                                                                                                                                           |                     |                    |                   |
| 1                                                                                                                                                                                               | 5 (35.7%)           | 9 (64.3%)          | 0.7144            |
| 2                                                                                                                                                                                               | 0 (0%)              | 1 (100%)           |                   |
| Initial pseudoprogression                                                                                                                                                                       |                     |                    |                   |
| No                                                                                                                                                                                              | 4 (30.8%)           | 9 (69.2%)          | 0.7883            |
| Yes                                                                                                                                                                                             | 1 (50%)             | 1 (50%)            |                   |
| Level of biomarkers                                                                                                                                                                             |                     |                    |                   |
| Initial LDH                                                                                                                                                                                     | 215.75 (96.94)      | 236.00 (75.03)     | 0.6875            |
| Final LDH                                                                                                                                                                                       | 170.6 (30.75)       | 197.50 (13.28)     | 0.2287            |
| Initial S100                                                                                                                                                                                    | 0.167 (0.11)        | 0.34 (0.78)        | 0.7341            |
| Final S100                                                                                                                                                                                      | 0.033 (0.01)        | 0.040 (0.023)      | 0.3913            |
| Time periods                                                                                                                                                                                    |                     |                    |                   |
| Time to M1 disease                                                                                                                                                                              | 1.32 (0.89)         | 1.58 (1.02)        | 0.6375            |
| Time to any response                                                                                                                                                                            | 4.82 (3.25)         | 3.70 (1.17)        | 0.6242            |
| <b>Time to complete response</b>                                                                                                                                                                | <b>13.04 (2.97)</b> | <b>4.90 (1.93)</b> | <b>&lt;0.0001</b> |
| The cut-off for late responders was 9 or more months to reach complete response. Bolded values denote statistical significance (p<0.05).                                                        |                     |                    |                   |

| Supplementary Table S3. The difference in alpha and beta diversity of fecal microbiome for different patient characteristics. |                 |              |                |                 |
|-------------------------------------------------------------------------------------------------------------------------------|-----------------|--------------|----------------|-----------------|
| Patient characteristic                                                                                                        | Alpha diversity |              | Beta diversity |                 |
|                                                                                                                               | Chao1 (p)       | Simpson (p)  | Jaccard (p)    | Bray Curtis (p) |
| Age <sup>1</sup>                                                                                                              | 0.12 (0.91)     | -1.06 (0.29) | 1.14 (0.17)    | 0.91 (0.62)     |
| Gender (m/f)                                                                                                                  | 0.29 (0.77)     | -1.15 (0.25) | 0.91 (0.64)    | 0.69 (0.85)     |
| Average daily activity <sup>1</sup>                                                                                           | -0.23 (0.82)    | -1.85 (0.06) | 1.08 (0.27)    | 0.93 (0.65)     |
| Breastfed status (y/n)                                                                                                        | 0.14 (0.89)     | -0.29 (0.77) | 0.88 (0.75)    | 0.60 (0.94)     |
| Sleep <sup>2</sup>                                                                                                            | -0.49 (0.62)    | -0.49 (0.62) | 0.87 (0.80)    | 0.64 (0.94)     |
| BRAF status <sup>3</sup>                                                                                                      | 0.00 (1.00)     | 0.73 (0.46)  | 1.05 (0.32)    | 1.37 (0.10)     |
| Type of immunotherapy <sup>4</sup>                                                                                            | 1.01 (0.31)     | 0.00 (1.00)  | 0.92 (0.63)    | 0.80 (0.73)     |

|                                             |                    |                    |                    |                    |
|---------------------------------------------|--------------------|--------------------|--------------------|--------------------|
| Number of metastatic sites <sup>5</sup>     | <b>1.96 (0.05)</b> | <b>2.08 (0.04)</b> | 1.18 (0.13)        | 0.74 (0.87)        |
| Time to metastasis <sup>1</sup>             | 0.23 (0.82)        | 0.46 (0.64)        | 1.01 (0.48)        | 0.65 (0.93)        |
| Bone metastases (y/n)                       | -0.36 (0.71)       | 0.12 (0.90)        | 1.25 (0.07)        | 0.94 (0.55)        |
| Cutaneous / subcutan. metastases (y/n)      | -0.82 (0.41)       | 0.59 (0.56)        | 1.06 (0.34)        | 0.89 (0.64)        |
| Lung metastases (y/n)                       | -0.59 (0.56)       | -0.59 (0.56)       | 1.01 (0.47)        | 1.31 (0.11)        |
| Lymph node metastases (y/n)                 | 0.58 (0.56)        | -0.34 (0.73)       | 1.13 (0.17)        | 1.06 (0.39)        |
| Recent use of analgetics (y/n)              | 0.39 (0.69)        | 0.52 (0.60)        | 0.89 (0.76)        | 1.09 (0.33)        |
| Initial nodal disease (y/n)                 | 0.07 (0.95)        | 0.20 (0.84)        | 1.02 (0.41)        | 1.07 (0.33)        |
| Initial LDH <sup>1</sup>                    | 0.43 (0.67)        | -0.14 (0.89)       | 1.03 (0.38)        | 0.80 (0.77)        |
| Initial S100 <sup>1</sup>                   | 1.22 (0.22)        | 1.54 (0.12)        | 1.19 (0.14)        | 1.24 (0.19)        |
| Time to complete response (CR) <sup>6</sup> | 0.24 (0.81)        | 0.49 (0.62)        | <b>1.43 (0.02)</b> | <b>1.65 (0.02)</b> |
| Time to partial response (PR) <sup>7</sup>  | -0.51 (0.61)       | -0.17 (0.86)       | 0.80 (0.89)        | 0.84 (0.57)        |
| BP drug use (y/n)                           | -0.47 (0.64)       | -0.47 (0.64)       | 0.88 (0.78)        | 1.07 (0.35)        |
| Antidiabetic drug use (y/n)                 | 0.87 (0.38)        | 1.29 (0.19)        | 1.20 (0.16)        | 1.08 (0.35)        |
| Hypolipemic drug use (y/n)                  | 0.00 (1.00)        | 0.29 (0.77)        | 1.19 (0.15)        | 1.39 (0.15)        |
| Supplement use (y/n)                        | -0.52 (0.60)       | 0.26 (0.79)        | 0.91 (0.68)        | 0.87 (0.62)        |
| Use of antibiotics with immunotherapy (y/n) | 1.43 (0.15)        | 1.83 (0.07)        | 1.24 (0.09)        | 0.95 (0.49)        |
| Obesity <sup>8</sup>                        | -1.59 (0.11)       | -0.86 (0.39)       | 1.09 (0.26)        | 1.27 (0.15)        |
| DII <sup>1</sup>                            | 0.78 (0.43)        | 1.43 (0.15)        | <b>1.43 (0.01)</b> | 1.38 (0.14)        |
| Industrial food use (y/n)                   | -0.94 (0.35)       | -0.82 (0.41)       | 1.00 (0.47)        | 0.51 (0.99)        |
| Number of daily meals (</> 4)               | 0.52 (0.60)        | 1.04 (0.29)        | 0.89 (0.72)        | 0.62 (0.95)        |
| Salt <sup>1</sup>                           | -1.50 (0.13)       | 0.00 (1.00)        | 0.87 (0.77)        | 0.92 (0.59)        |
| High fibre diet (</> 20g/day)               | -0.58 (0.56)       | 1.01 (0.31)        | 0.75 (0.94)        | 0.47 (0.99)        |
| Use of HG milk (y/n)                        | -0.91 (0.36)       | -0.78 (0.43)       | 1.14 (0.19)        | 1.29 (0.18)        |
| Use of HG fruit (y/n)                       | -0.35 (0.73)       | -0.92 (0.35)       | 1.07 (0.29)        | 1.00 (0.45)        |
| Use of HG vegetable (y/n)                   | 0.26 (0.79)        | 0.52 (0.60)        | 0.78 (0.93)        | 0.56 (0.97)        |
| Use of HG meat (y/n)                        | -0.25 (0.81)       | 0.85 (0.39)        | 0.79 (0.91)        | 0.89 (0.61)        |
| Breakfast time (early vs. late)             | 0.14 (0.89)        | 0.00 (1.00)        | 0.88 (0.76)        | 1.06 (0.37)        |
| Dinner time (early vs. late)                | -1.16 (0.24)       | -1.68 (0.09)       | 0.75 (0.95)        | 0.61 (0.96)        |

Bolded values denote statistical significance (p<0.05).  
<sup>1</sup> Based on the median value. <sup>2</sup> More or less than 7 hours average. <sup>3</sup> Mutated vs. wild type. <sup>4</sup> Mono vs. dual. <sup>5</sup> Up to two vs. three and more different organs. <sup>6</sup> Based on the difference early vs. late complete response to immunotherapy with the cut-off of 9 months. <sup>7</sup> Based of whether partial response was present on initial scan. <sup>8</sup> Based on BMI more or less than 25. CR = complete response. PR = partial response. DII = Dietary inflammatory index. HG = home-grown. M/f = male vs. female. Y/n = yes vs. no.

Supplementary Table S4: The difference in relative abundance of specific bacterial families, previously associated with a significant effect on immunotherapy in melanoma patients, between early and late metastatic melanoma responders to immunotherapy

|                                           | Early responders (N=10) <sup>a</sup> |                       | Late responders (N=5) <sup>a</sup> |                      | p-value      |
|-------------------------------------------|--------------------------------------|-----------------------|------------------------------------|----------------------|--------------|
|                                           | Median                               | 25 - 75 Percentile    | Median                             | 25 - 75 Percentile   |              |
| <i>Akkermansia</i> <sup>19</sup>          | 0.0950                               | 0.000 - 1.060         | 0.0200                             | 0.0150 - 0.550       | 0.49         |
| <i>Bacteroidaceae</i> <sup>19</sup>       | 11.540                               | 5.600 - 13.000        | 10.770                             | 7.610 - 17.413       | 1.00         |
| <i>Bifidobacteriaceae</i> <sup>9,17</sup> | 1.565                                | 0.730 - 2.740         | 2.200                              | 1.608 - 3.540        | 0.39         |
| <i>Clostridiales</i> <sup>18</sup>        | 1.900                                | 1.680 - 2.800         | 2.820                              | 1.683 - 3.285        | 0.54         |
| <i>Coriobacteriaceae</i> <sup>17</sup>    | 0.445                                | 0.320 - 0.810         | 0.180                              | 0.165 - 0.520        | 0.33         |
| <i>Lachnospiraceae</i> <sup>16,17</sup>   | 29.425                               | 23.430 - 35.610       | 32.410                             | 31.160 - 35.000      | 0.33         |
| <i>Lactobacillaceae</i> <sup>19</sup>     | 0.755                                | 0.590 - 1.040         | 0.830                              | 0.180 - 1.920        | 1.00         |
| <i>Prevotellaceae</i> <sup>11,19</sup>    | <b>1.555</b>                         | <b>0.0100 - 6.390</b> | <b>0.000</b>                       | <b>0.000 - 0.323</b> | <b>0.046</b> |
| <i>Ruminococceae</i> <sup>4,11,17</sup>   | 11.740                               | 9.100 - 13.900        | 12.590                             | 11.180 - 23.330      | 0.39         |

<sup>a</sup> The cut-off for late responders was 9 or more months to reach complete response. Bolded values denote statistical significance (p<0.05).

Supplementary Table S5: The difference in abundance score of specific bacterial phyla previously associated with a significant effect on immunotherapy in melanoma patients between early and late metastatic melanoma responders to immunotherapy

|                              | Early responders (N=10) <sup>a</sup> |                         | Late responders (N=5) <sup>a</sup> |                         | p-value |
|------------------------------|--------------------------------------|-------------------------|------------------------------------|-------------------------|---------|
|                              | Median                               | 25 - 75 Percentile      | Median                             | 25 - 75 Percentile      |         |
| Actinobacteria <sup>10</sup> | 26237.460                            | 15556.300 - 39405.390   | 35281.210                          | 32687.532 - 39175.553   | 0.39    |
| Bacteroidetes <sup>10</sup>  | 250801.885                           | 225039.200 - 299399.010 | 271869.900                         | 160070.385 - 388830.420 | 0.90    |
| Firmicutes <sup>10,16</sup>  | 548194.620                           | 397259.880 - 634760.690 | 608623.350                         | 504873.498 - 773533.362 | 0.46    |
| Proteobacteria <sup>10</sup> | 15001.600                            | 11779.770 - 29677.620   | 10153.390                          | 6799.110 - 16804.502    | 0.27    |

<sup>a</sup> The cut-off for late responders was 9 or more months to reach complete response.

| Patient | Weight (kg) | Height (m) | BMI   | BMI class | DII   | MDS  | Mifflin St Jeor equation (kCal) | Energy intake (kCal) | Number of daily meals | Regular use of HG food | HG milk | HG fruit | HG vegetable | HG meat | Regular use of industrial pre-made food | Use of artificial sweeteners | Time of breakfast (hour of the day) | Time of lunch (hour of the day) | Time of dinner (hour of the day) |
|---------|-------------|------------|-------|-----------|-------|------|---------------------------------|----------------------|-----------------------|------------------------|---------|----------|--------------|---------|-----------------------------------------|------------------------------|-------------------------------------|---------------------------------|----------------------------------|
| #1      | 83          | 1.72       | 28.06 | OW        | 3.10  | 4.50 | 1910.00                         | 2207.99              | 3                     | yes                    | no      | no       | yes          | yes     | Sometimes                               | no                           | 6 to 7                              | 14 to 15                        | 18-19                            |
| #2      | 120         | 1.87       | 34.32 | obese     | -0.49 | 5.25 | 2373.75                         | 1999.03              | 4                     | yes                    | yes     | yes      | yes          | yes     | no                                      | no                           | 9                                   | 12                              | 17                               |
| #3      | 85          | 1.8        | 26.23 | OW        | 2.79  | 5.50 | 1980.00                         | 1992.36              | 3                     | yes                    | no      | yes      | yes          | yes     | no                                      | no                           | 7 to 8                              | 16                              | no dinner                        |
| #4      | 79          | 1.86       | 22.84 | normal    | -1.82 | 9.25 | 1957.50                         | 2473.61              | 5                     | yes                    | no      | yes      | yes          | yes     | no                                      | no                           | 6 to 7                              | 12                              | 19-20                            |
| #5      | 60          | 1.61       | 23.15 | normal    | 3.79  | 5.50 | 1445.25                         | 1708.83              | 6                     | no                     | no      | no       | no           | no      | no                                      | no                           | 7 to 8                              | 12:30                           | 18:30-20                         |
| #6      | 90          | 1.72       | 30.42 | obese     | 1.52  | 6.50 | 1814.00                         | 1657.03              | 5                     | yes                    | yes     | yes      | yes          | yes     | no                                      | no                           | 8                                   | 13                              | 18                               |
| #7      | 78          | 1.76       | 25.18 | OW        | 3.10  | 5.75 | 1885.00                         | 2142.17              | 4                     | yes                    | no      | no       | yes          | no      | no                                      | no                           | 7 to 8                              | 12                              | 15-16                            |
| #8      | 85          | 1.82       | 25.66 | OW        | -0.17 | 8    | 1992.50                         | 1944.77              | 2                     | yes                    | no      | no       | yes          | yes     | Sometimes                               | no                           | no breakfast                        | 12                              | 18                               |
| #9      | 75          | 1.69       | 26.26 | OW        | 1.64  | 5.25 | 1645.25                         | 2108.98              | 4                     | yes                    | yes     | yes      | yes          | yes     | no                                      | no                           | 6 to 7                              | 12:30                           | 20                               |
| #10     | 73          | 1.73       | 24.39 | normal    | 1.18  | 5.25 | 1816.25                         | 1972.72              | 4                     | yes                    | no      | yes      | yes          | yes     | no                                      | no                           | 7                                   | 11                              | 17                               |
| #11     | 80          | 1.74       | 26.42 | OW        | 2.37  | 4.75 | 1892.50                         | 1818.13              | 4                     | yes                    | no      | yes      | no           | yes     | Sometimes                               | no                           | 7 to 8                              | 11:30-13                        | 19                               |
| #12     | 98          | 1.76       | 31.64 | obese     | 3.44  | 4.25 | 2085.00                         | 1804.97              | 5                     | yes                    | no      | no       | no           | no      | regularly                               | yes                          | 9                                   | 14                              | 18                               |
| #13     | 76          | 1.76       | 24.54 | normal    | 2.51  | 5.50 | 1865.00                         | 2188.21              | 4                     | yes                    | no      | yes      | yes          | yes     | no                                      | no                           | 7 to 8                              | 12                              | 18:30                            |
| #14     | 117         | 1.91       | 32.07 | obese     | 1.68  | 6.25 | 2368.75                         | 2204.94              | 3                     | yes                    | yes     | no       | yes          | no      | Sometimes                               | no                           | 9                                   | 14:30                           | 19:30                            |
| #15     | 74          | 1.75       | 24.16 | normal    | -1.35 | 7    | 1838.75                         | 2446.00              | 5                     | no                     | no      | no       | no           | no      | Sometimes                               | no                           | 7 to 8                              | 12                              | 19                               |

DII = dietary inflammatory index, HG = home-grown, OW = overweight, MDS = Mediterranean Diet Score

Supplementary Table S7: The difference in food intake between metastatic melanoma patients with early or late response to immunotherapy.

|                                          | Cohort                               |           |                                    |           | Between-Subjects Effects | Within-Subjects Effects |
|------------------------------------------|--------------------------------------|-----------|------------------------------------|-----------|--------------------------|-------------------------|
|                                          | Early responders (N=10) <sup>a</sup> |           | Late responders (N=5) <sup>a</sup> |           |                          |                         |
|                                          | Mean                                 | SD        | Mean                               | SD        |                          |                         |
| Alcohol (% caloric intake)               | 1,647                                | 4,2101    | 3,500                              | 4,9029    | 0,379                    | 0,406*                  |
| Alcohol (g)                              | 4,149                                | 10,3716   | 10,992                             | 14,5049   | 0,237                    | 0,660*                  |
| Alcoholic drinks (g)                     | 25,536                               | 63,6602   | 118,572                            | 190,4176  | 0,090                    | 0,517*                  |
| Anthocyanidin (mg)                       | 131,328                              | 209,4609  | 266,063                            | 333,6942  | 0,094                    | 0,340**                 |
| Beta-carotene (mg)                       | 3234,557                             | 3519,4818 | 4577,746                           | 4871,5676 | 0,396                    | 0,079*                  |
| Plant fibre (% recommended daily intake) | 102,170                              | 43,7425   | 90,161                             | 31,2327   | 0,540                    | 0,914*                  |
| Plant fibre (g)                          | 25,543                               | 10,9359   | 22,541                             | 7,8080    | 0,540                    | 0,914*                  |
| Ca (% recommended daily intake)          | 105,642                              | 45,3124   | 94,750                             | 38,1569   | 0,555                    | 0,658*                  |
| Ca (mg)                                  | 1056,418                             | 453,1296  | 947,504                            | 381,5836  | 0,555                    | 0,658*                  |
| Cinnamon (g)                             | 0,0500                               | 0,2481    | 0,000                              | 0,0000    | 0,380                    | 0,448**                 |
| Curry (g)                                | 0,000                                | 0,0000    | 0,000                              | 0,0000    | -                        | -                       |
| Garlic (g)                               | 3,482                                | 2,3519    | 5,129                              | 7,8660    | 0,320                    | 0,329**                 |
| DII                                      | 1,981                                | 1,9205    | 0,693                              | 2,3553    | 0,192                    | 0,605*                  |

|                                                |          |           |          |           |       |         |
|------------------------------------------------|----------|-----------|----------|-----------|-------|---------|
| Added fats (g)                                 | 17,937   | 12,1490   | 24,053   | 13,2629   | 0,231 | 0,563*  |
| Ginger (g)                                     | 0,00900  | 0,05692   | 0,000    | 0,0000    | 0,500 | 0,365** |
| Energy intake (kcal)                           | 2036,617 | 289,4360  | 2060,717 | 438,0011  | 0,864 | 0,654*  |
| Energy drinks (ml)                             | 0,000    | 0,0000    | 0,000    | 0,0000    | -     | -       |
| Energy (% recommended daily intake)            | 93,210   | 14,8473   | 93,617   | 15,8333   | 0,949 | 0,513*  |
| Energy needs (BMR i TA)                        | 2639,070 | 156,9961  | 2747,510 | 600,5819  | 0,618 | -       |
| Fe (% recommended daily intake)                | 191,486  | 167,2116  | 180,213  | 59,7302   | 0,838 | 0,247*  |
| Fe (mg)                                        | 21,064   | 18,3935   | 19,823   | 6,5700    | 0,838 | 0,247*  |
| Flavan-3-ol (mg)                               | 19,357   | 19,0778   | 14,491   | 13,2824   | 0,488 | 0,768** |
| Flavones (mg)                                  | 3,616    | 3,9908    | 9,073    | 9,1212    | 0,027 | 0,640*  |
| Flavonols (mg)                                 | 109,447  | 91,4019   | 80,232   | 50,1669   | 0,247 | 0,773*  |
| Flavonones (mg)                                | 14,582   | 33,9864   | 14,180   | 35,4782   | 0,976 | 0,289** |
| Folate (% recommended daily intake)            | 85,540   | 48,7608   | 96,431   | 51,4771   | 0,621 | 0,895*  |
| Folate (mg)                                    | 273,725  | 156,0367  | 308,575  | 164,7256  | 0,621 | 0,895*  |
| Carbonates drinks (g)                          | 0,000    | 0,0000    | 0,000    | 0,0000    | -     | -       |
| Legumes (% recommended daily intake)           | 87,741   | 152,4824  | 68,333   | 168,4024  | 0,737 | 0,993*  |
| Legumes (g)                                    | 39,483   | 68,6166   | 30,750   | 75,7815   | 0,737 | 0,993*  |
| I (% recommended daily intake)                 | 38,150   | 19,2814   | 48,137   | 44,9610   | 0,491 | 0,913** |
| I (mcg)                                        | 57,225   | 28,9219   | 72,207   | 67,4431   | 0,491 | 0,913** |
| Eggs (% recommended daily intake)              | 230,303  | 373,7357  | 230,770  | 439,4162  | 0,996 | 0,918*  |
| Eggs (g)                                       | 29,939   | 48,5856   | 30,000   | 57,1241   | 0,996 | 0,918*  |
| K (% recommended daily intake)                 | 96,722   | 26,9172   | 107,638  | 27,1342   | 0,398 | 0,815*  |
| K (mg)                                         | 3385,267 | 942,1071  | 3767,328 | 949,7048  | 0,398 | 0,815*  |
| Coffee (g)                                     | 85,000   | 72,6777   | 95,000   | 91,6228   | 0,810 | 0,244*  |
| Cumin (g)                                      | 0,000    | 0,0000    | 0,000    | 0,0000    | -     | -       |
| Cloves (g)                                     | 0,000    | 0,0000    | 0,000    | 0,0000    | -     | -       |
| Caffeine (mg)                                  | 181,574  | 154,2206  | 202,086  | 194,3265  | 0,816 | 0,248*  |
| Cholesterol (% recommended daily intake)       | 119,291  | 67,1259   | 125,563  | 80,4426   | 0,768 | 0,743*  |
| Cholesterol (mg)                               | 357,873  | 201,3762  | 376,688  | 241,3305  | 0,768 | 0,743*  |
| Potato (g)                                     | 103,036  | 136,8100  | 188,286  | 142,2395  | 0,067 | 0,540*  |
| Turmeric (mg)                                  | 0,000    | 0,0000    | 0,000    | 0,0000    | -     | -       |
| Onion (g)                                      | 6,450    | 20,6086   | 1,300    | 5,8138    | 0,445 | 0,661** |
| Thyme (g)                                      | 0,0750   | 0,1256    | 0,0300   | 0,07327   | 0,364 | 0,741*  |
| MDS                                            | 5,650    | 1,8053    | 6,400    | 2,0622    | 0,324 | 0,820*  |
| Meat (% recommended daily intake)              | 207,178  | 142,2026  | 210,137  | 193,0323  | 0,955 | 0,947*  |
| Meat (g)                                       | 176,101  | 120,8717  | 178,616  | 164,0778  | 0,955 | 0,947*  |
| Mg (% recommended daily intake)                | 107,675  | 43,9047   | 105,151  | 27,4672   | 0,895 | 0,682*  |
| Mg (mg)                                        | 376,861  | 153,6661  | 368,030  | 96,1360   | 0,895 | 0,682*  |
| Dairy products (% recommended daily intake)    | 162,999  | 104,0221  | 90,343   | 92,8772   | 0,150 | 0,614*  |
| Dairy products (g)                             | 407,500  | 260,0545  | 225,857  | 232,1931  | 0,150 | 0,614*  |
| Monounsaturated fatty acids (% caloric intake) | 14,383   | 4,0007    | 14,209   | 4,9839    | 0,895 | 0,659*  |
| Monounsaturated fatty acids (g)                | 32,887   | 10,5157   | 32,681   | 14,3541   | 0,960 | 0,902*  |
| Na (% recommended daily intake)                | 182,925  | 62,4301   | 193,722  | 53,2671   | 0,656 | 0,705** |
| Na (mg)                                        | 3658,479 | 1248,6008 | 3874,423 | 1065,3170 | 0,656 | 0,705** |
| Niacin (% recommended daily intake)            | 122,270  | 52,3610   | 140,950  | 57,1036   | 0,378 | 0,286*  |
| Niacin (mg)                                    | 11,389   | 4,6682    | 13,306   | 5,6780    | 0,328 | 0,337*  |
| Omega-3 (g)                                    | 0,544    | 0,5260    | 0,907    | 1,1331    | 0,331 | 0,526** |
| Omega-6 (g)                                    | 0,691    | 0,5219    | 0,673    | 0,5862    | 0,911 | 0,155*  |
| Nuts (% recommended daily intake)              | 29,762   | 61,6380   | 17,500   | 43,7547   | 0,578 | 0,697*  |
| Nuts (g)                                       | 8,929    | 18,4915   | 5,250    | 13,1264   | 0,578 | 0,697*  |
| Oregano (g)                                    | 0,0975   | 0,1804    | 0,0300   | 0,07327   | 0,205 | 0,902** |
| Other polyphenols (mg)                         | 330,263  | 202,4377  | 362,603  | 166,5507  | 0,704 | 0,327*  |
| P (% recommended daily intake)                 | 163,126  | 42,1422   | 146,394  | 37,3145   | 0,382 | 0,264*  |
| P (mg)                                         | 1631,256 | 421,4211  | 1463,944 | 373,1492  | 0,382 | 0,264*  |
| Pepper (mg)                                    | 0,442    | 0,3637    | 0,305    | 0,3187    | 0,341 | 0,622*  |
| Polyunsaturated fatty acids (% caloric intake) | 5,818    | 2,4680    | 8,386    | 4,2103    | 0,099 | 0,541*  |
| Polyunsaturated fatty acids (g)                | 12,968   | 5,0158    | 19,189   | 10,9417   | 0,105 | 0,540*  |

|                                               |         |           |         |          |       |         |
|-----------------------------------------------|---------|-----------|---------|----------|-------|---------|
| Vegetables without potato (g)                 | 272,670 | 174,7016  | 372,036 | 214,5530 | 0,116 | 0,833*  |
| Proteins (% caloric intake)                   | 19,536  | 2,6378    | 18,494  | 3,3775   | 0,273 | 0,692*  |
| Proteins (% recommended daily intake g/kg BM) | 178,100 | 50,5530   | 133,946 | 23,1728  | 0,005 | 0,365** |
| Proteins (g)                                  | 91,658  | 24,7117   | 92,703  | 31,4135  | 0,926 | 0,818** |
| Retinol (vit. A (% recommended daily intake)) | 104,519 | 196,3248  | 75,189  | 44,9043  | 0,502 | 0,306** |
| Retinol (vit. A (mcg))                        | 700,276 | 1763,3724 | 428,583 | 255,9531 | 0,492 | 0,322** |
| Fish (% recommended daily intake)             | 44,643  | 199,4543  | 216,735 | 469,6637 | 0,127 | 0,814** |
| Fish (g)                                      | 15,625  | 69,8091   | 75,857  | 164,3817 | 0,127 | 0,814** |
| Rosemary (g)                                  | 0,0175  | 0,1107    | 0,0600  | 0,1875   | 0,258 | 0,923*  |
| Se (% recommended daily intake)               | 42,216  | 29,2344   | 69,326  | 71,3885  | 0,173 | 0,138*  |
| Se (mg)                                       | 29,553  | 20,4640   | 48,530  | 49,9727  | 0,173 | 0,138*  |
| Sweets (g)                                    | 54,170  | 56,9123   | 14,590  | 23,4487  | 0,040 | 0,664** |
| Juice (g)                                     | 16,250  | 58,1637   | 15,000  | 67,0820  | 0,962 | 0,335** |
| Vegetables (% recommended daily intake)       | 107,345 | 62,6457   | 160,091 | 84,3996  | 0,051 | 0,740*  |
| Vegetables (g)                                | 375,706 | 219,2604  | 560,321 | 295,3988 | 0,051 | 0,740*  |
| Trans-unsaturated fatty acids (g)             | 1,799   | 1,3487    | 1,562   | 1,0549   | 0,575 | 0,943*  |
| Carbohydrates (% caloric intake)              | 42,265  | 7,5198    | 41,955  | 10,6753  | 0,912 | 0,712*  |
| Carbohydrates (g)                             | 215,439 | 51,5412   | 212,542 | 62,2162  | 0,889 | 0,903** |
| Total fats (% caloric intake)                 | 38,224  | 6,8268    | 36,799  | 9,1744   | 0,556 | 0,530*  |
| Total fats (g)                                | 86,576  | 19,6686   | 84,755  | 30,9805  | 0,829 | 0,561*  |
| Vit. B1 (% recommended daily intake)          | 196,089 | 95,7253   | 193,617 | 93,9826  | 0,951 | 0,726*  |
| Vit. B1 (mg)                                  | 1,510   | 0,7364    | 1,492   | 0,7229   | 0,951 | 0,726*  |
| Vit. B12 (% recommended daily intake)         | 108,933 | 63,7448   | 170,230 | 202,4766 | 0,215 | 0,710** |
| Vit. B12 (mg)                                 | 4,357   | 2,5501    | 6,809   | 8,0994   | 0,215 | 0,710** |
| Vit. B2 (% recommended daily intake)          | 206,257 | 70,9967   | 163,671 | 58,6162  | 0,171 | 1,000*  |
| Vit. B2 (mg)                                  | 1,877   | 0,6459    | 1,488   | 0,5329   | 0,171 | 1,000*  |
| Vit. B6 (% recommended daily intake)          | 187,512 | 183,1139  | 196,478 | 77,6274  | 0,892 | 0,308** |
| Vit. B6 (mg)                                  | 1,994   | 1,9153    | 1,988   | 0,8135   | 0,994 | 0,291** |
| Vit. C (% recommended daily intake)           | 142,199 | 89,4487   | 177,704 | 86,2466  | 0,352 | 0,836*  |
| Vit. C (mg)                                   | 85,293  | 42,4830   | 99,474  | 43,7323  | 0,408 | 0,735*  |
| Vit. D (% recommended daily intake)           | 13,857  | 15,3065   | 42,549  | 52,0123  | 0,050 | 0,416*  |
| Vit. D (mcg)                                  | 2,079   | 2,2959    | 6,380   | 7,8023   | 0,050 | 0,416*  |
| Vit. E (% recommended daily intake)           | 125,417 | 74,3475   | 159,623 | 99,9404  | 0,392 | 0,651** |
| Vit. E (mg)                                   | 16,304  | 9,6656    | 20,752  | 12,9913  | 0,392 | 0,651** |
| Fruits (% recommended daily intake)           | 134,779 | 75,1886   | 141,259 | 97,2922  | 0,827 | 0,281** |
| Fruits (g)                                    | 269,557 | 150,3767  | 282,518 | 194,5844 | 0,827 | 0,281** |
| Saturated fatty acids (% caloric intake)      | 16,160  | 6,0581    | 12,030  | 4,2199   | 0,058 | 0,299** |
| Saturated fatty acids (g)                     | 36,627  | 13,9657   | 27,927  | 11,6296  | 0,058 | 0,284** |
| Zn (% recommended daily intake)               | 95,898  | 29,5376   | 105,192 | 42,8322  | 0,491 | 0,095** |
| Zn (mg)                                       | 15,344  | 4,7260    | 16,831  | 6,8536   | 0,491 | 0,095** |
| Grains (% recommended daily intake)           | 99,972  | 49,4513   | 104,099 | 83,6490  | 0,872 | 0,519** |
| Grains (g)                                    | 231,937 | 114,7272  | 241,512 | 194,0641 | 0,872 | 0,519** |

DII= dietary inflammatory index. <sup>a</sup> The cut-off for late responders was 9 or more months to reach complete response.  
\* Huynh-Feldt \*\*Greenhouse-Geisser

| Supplementary Table S8: Univariate logistic regression analysis on dietary components previously shown to be associated with significant difference between metastatic melanoma patients with early and late response to immunotherapy. |                       |                         |         |
|-----------------------------------------------------------------------------------------------------------------------------------------------------------------------------------------------------------------------------------------|-----------------------|-------------------------|---------|
| Dietary component                                                                                                                                                                                                                       | Univariate odds ratio | 95% Confidence interval | p-value |
| Alcohol (g/day)                                                                                                                                                                                                                         | 1,0061                | 1,0008 to 1,0116        | 0,0248  |
| Anthocyanin (mg/day)                                                                                                                                                                                                                    | 1,0019                | 0,9998 to 1,0040        | 0,0742  |
| Flavones (mg/day)                                                                                                                                                                                                                       | 0,9996                | 0,9839 to 1,0157        | 0,9655  |
| Potatoes (g/day)                                                                                                                                                                                                                        | 1,0043                | 1,0003 to 1,0082        | 0,0329  |
| Polyunsaturated fatty acids (% energy intake)                                                                                                                                                                                           | 1,2684                | 1,0628 to 1,5139        | 0,0084  |
| Proteins (% recommended protein (g) use per body weight (kg))                                                                                                                                                                           | 0,9714                | 0,9535 to 0,9896        | 0,0022  |
| Sweets (g/day)                                                                                                                                                                                                                          | 0,9747                | 0,9563 to 0,9934        | 0,0084  |



|                                         |        |                  |        |
|-----------------------------------------|--------|------------------|--------|
| All vegetable (g/day)                   | 1,0102 | 1,0022 to 1,0184 | 0,0130 |
| Vitamin D (mcg/day)                     | 1,0332 | 1,0033 to 1,0641 | 0,0293 |
| Saturated fatty acids (% energy intake) | 0,8481 | 0,7453 to 0,9651 | 0,0125 |

| Supplementary Table S9: Correlation coefficients (r) between selected dietary components and absolute abundance of selected bacteria on phylum, family and species levels. |                                             |                       |                                  |                          |                                  |                          |                                     |                          |                              |                                      |                             |                             |
|----------------------------------------------------------------------------------------------------------------------------------------------------------------------------|---------------------------------------------|-----------------------|----------------------------------|--------------------------|----------------------------------|--------------------------|-------------------------------------|--------------------------|------------------------------|--------------------------------------|-----------------------------|-----------------------------|
|                                                                                                                                                                            | Recomm.<br>protein<br>intake (%<br>day) (p) | SFA<br>(g/day)<br>(p) | PUFA<br>(% en.<br>intake)<br>(p) | Fibres<br>(g/day)<br>(p) | Vitamin<br>D<br>(mcg/day)<br>(p) | Sodium<br>(g/day)<br>(p) | All<br>vegetables<br>(g/day)<br>(p) | Sweets<br>(g/day)<br>(p) | Flavones<br>(mcg/day)<br>(p) | Antho-<br>cyanin<br>(mcg/day)<br>(p) | Alcohol<br>(g/day)          | Potato<br>(g/dy)            |
| PHYLUM LEVEL                                                                                                                                                               |                                             |                       |                                  |                          |                                  |                          |                                     |                          |                              |                                      |                             |                             |
| Actinobacteria                                                                                                                                                             | -0.32<br>(0.24)                             | 0.17<br>(0.53)        | -0.06<br>(0.83)                  | 0.20<br>(0.46)           | 0.09<br>(0.72)                   | 0.46<br>(0.08)           | 0.50<br>(0.06)                      | -0.23<br>(0.40)          | 0.05<br>(0.86)               | 0.21<br>(0.44)                       | 0.02<br>(0.94)              | 0.34<br>(0.22)              |
| Firmicutes                                                                                                                                                                 | -0.19<br>(0.49)                             | 0.10<br>(0.71)        | 0.29<br>(0.29)                   | 0.05<br>(0.85)           | 0.46<br>(0.09)                   | 0.07<br>(0.79)           | -0.04<br>(0.89)                     | <-0.01<br>(0.98)         | 0.15<br>(0.59)               | 0.56<br>(0.03)                       | 0.27<br>(0.33)              | 0.68<br>( <b>&lt;0.01</b> ) |
| Bacteroidetes                                                                                                                                                              | -0.06<br>(0.83)                             | 0.27<br>(0.32)        | 0.22<br>(0.43)                   | 0.11<br>(0.71)           | 0.37<br>(0.18)                   | 0.14<br>(0.63)           | -0.41<br>(0.13)                     | 0.36<br>(0.18)           | -0.25<br>(0.36)              | -0.32<br>(0.25)                      | -0.39<br>(0.15)             | -0.03<br>(0.90)             |
| Proteobacteria                                                                                                                                                             | 0.12<br>(0.66)                              | 0.41<br>(0.13)        | 0.01<br>(0.97)                   | <0.01<br>(0.97)          | -0.09<br>(0.75)                  | 0.14<br>(0.61)           | -0.05<br>(0.87)                     | 0.43<br>(0.10)           | -0.17<br>(0.54)              | -0.38<br>(0.16)                      | -0.21<br>(0.45)             | <-0.01<br>(0.98)            |
| FAMILY LEVEL                                                                                                                                                               |                                             |                       |                                  |                          |                                  |                          |                                     |                          |                              |                                      |                             |                             |
| <i>Prevotellaceae</i>                                                                                                                                                      | 0.33<br>(0.23)                              | 0.39<br>(0.14)        | -0.29<br>(0.31)                  | 0.04<br>(0.88)           | -0.15<br>(0.60)                  | 0.38<br>(0.16)           | -0.24<br>(0.38)                     | 0.47<br>(0.08)           | -0.15<br>(0.59)              | -0.37<br>(0.17)                      | -0.16<br>(0.57)             | -0.23<br>(0.40)             |
| <i>Bacteroidaceae</i>                                                                                                                                                      | -0.30<br>(0.28)                             | -0.11<br>(0.69)       | 0.53<br>(0.04)                   | 0.07<br>(0.79)           | 0.69<br>( <b>&lt;0.01</b> )      | -0.16<br>(0.58)          | -0.38<br>(0.16)                     | 0.02<br>(0.94)           | -0.20<br>(0.46)              | -0.02<br>(0.93)                      | -0.36<br>(0.19)             | 0.05<br>(0.85)              |
| <i>Bifidobacteriaceae</i>                                                                                                                                                  | -0.35<br>(0.19)                             | 0.24<br>(0.39)        | <0.01<br>(0.99)                  | 0.27<br>(0.33)           | 0.17<br>(0.54)                   | 0.40<br>(0.14)           | 0.38<br>(0.15)                      | -0.21<br>(0.45)          | -0.14<br>(0.61)              | 0.22<br>(0.42)                       | -0.23<br>(0.41)             | 0.36<br>(0.18)              |
| <i>Clostridiales</i>                                                                                                                                                       | -0.36<br>(0.19)                             | 0.07<br>(0.79)        | 0.35<br>(0.19)                   | -0.23<br>(0.40)          | 0.23<br>(0.41)                   | -0.04<br>(0.87)          | -0.27<br>(0.33)                     | 0.06<br>(0.83)           | -0.11<br>(0.70)              | 0.19<br>(0.49)                       | 0.03<br>(0.90)              | 0.51<br>(0.05)              |
| <i>Lactobacillaceae</i>                                                                                                                                                    | -0.08<br>(0.77)                             | -0.08<br>(0.76)       | -0.14<br>(0.62)                  | -0.19<br>(0.49)          | 0.11<br>(0.68)                   | 0.05<br>(0.85)           | 0.24<br>(0.39)                      | -0.03<br>(0.92)          | 0.54<br>(0.04)               | -0.05<br>(0.87)                      | 0.64<br>(0.01)              | -0.09<br>(0.75)             |
| <i>Akkermansiaceae</i>                                                                                                                                                     | -0.14<br>(0.62)                             | -0.07<br>(0.79)       | -0.21<br>(0.45)                  | 0.14<br>(0.61)           | -0.18<br>(0.51)                  | 0.35<br>(0.19)           | 0.20<br>(0.47)                      | -0.37<br>(0.17)          | 0.32<br>(0.24)               | -0.17<br>(0.54)                      | 0.18<br>(0.52)              | -0.33<br>(0.23)             |
| <i>Ruminococcaceae</i>                                                                                                                                                     | -0.35<br>(0.19)                             | -0.25<br>(0.37)       | 0.08<br>(0.77)                   | -0.13<br>(0.64)          | 0.11<br>(0.69)                   | 0.16<br>(0.55)           | 0.31<br>(0.26)                      | -0.22<br>(0.43)          | 0.56<br>(0.03)               | 0.32<br>(0.24)                       | 0.79<br>( <b>&lt;0.01</b> ) | 0.46<br>(0.09)              |
| <i>Lachnospiraceae</i>                                                                                                                                                     | -0.21<br>(0.46)                             | 0.07<br>(0.79)        | 0.34<br>(0.21)                   | 0.17<br>(0.54)           | 0.51<br>(0.05)                   | 0.09<br>(0.74)           | <-0.01<br>(0.99)                    | -0.15<br>(0.59)          | 0.13<br>(0.63)               | 0.42<br>(0.12)                       | <0.01<br>(0.98)             | 0.58<br>(0.02)              |
| <i>Coriobacteriaceae</i>                                                                                                                                                   | 0.48<br>(0.07)                              | -0.07<br>(0.81)       | -0.18<br>(0.50)                  | -0.22<br>(0.44)          | -0.22<br>(0.42)                  | -0.24<br>(0.38)          | 0.12<br>(0.67)                      | 0.24<br>(0.38)           | 0.04<br>(0.88)               | -0.05<br>(0.86)                      | 0.45<br>(0.09)              | -0.18<br>(0.52)             |
| SPECIES LEVEL                                                                                                                                                              |                                             |                       |                                  |                          |                                  |                          |                                     |                          |                              |                                      |                             |                             |
| <i>Coprococcus comes</i>                                                                                                                                                   | -0.33<br>(0.22)                             | -0.12<br>(0.67)       | 0.17<br>(0.55)                   | -0.26<br>(0.34)          | 0.47<br>(0.07)                   | 0.11<br>(0.69)           | 0.13<br>(0.64)                      | -0.08<br>(0.78)          | 0.27<br>(0.32)               | 0.31<br>(0.25)                       | 0.29<br>(0.29)              | 0.45<br>(0.09)              |
| <i>Bifidobacterium pseudocatenulatum</i>                                                                                                                                   | -0.48<br>(0.07)                             | -0.16<br>(0.58)       | 0.51<br>(0.05)                   | 0.11<br>(0.68)           | 0.74<br>( <b>&lt;0.01</b> )      | 0.32<br>(0.24)           | -0.03<br>(0.91)                     | -0.39<br>(0.15)          | 0.18<br>(0.52)               | 0.20<br>(0.47)                       | <-0.01<br>(0.98)            | 0.19<br>(0.50)              |
| <i>Barnesiella intestinihominis</i>                                                                                                                                        | 0.02<br>(0.93)                              | 0.21<br>(0.46)        | 0.03<br>(0.92)                   | 0.19<br>(0.48)           | -0.18<br>(0.51)                  | 0.07<br>(0.80)           | -0.18<br>(0.52)                     | 0.23<br>(0.40)           | -0.17<br>(0.55)              | -0.39<br>(0.14)                      | -0.27<br>(0.34)             | -0.22<br>(0.43)             |
| <i>Sutterella wadsworthensis</i>                                                                                                                                           | 0.39<br>(0.15)                              | 0.01<br>(0.96)        | -0.19<br>(0.47)                  | -0.06<br>(0.82)          | -0.18<br>(0.52)                  | -0.48<br>(0.06)          | -0.23<br>(0.40)                     | 0.24<br>(0.39)           | -0.17<br>(0.55)              | -0.24<br>(0.39)                      | 0.14<br>(0.61)              | -0.17<br>(0.55)             |
| <i>Bacteroides finegoldii</i>                                                                                                                                              | 0.19<br>(0.49)                              | 0.42<br>(0.12)        | -0.26<br>(0.35)                  | -0.17<br>(0.55)          | -0.17<br>(0.55)                  | -0.27<br>(0.33)          | -0.34<br>(0.21)                     | 0.49<br>(0.06)           | -0.21<br>(0.44)              | -0.51<br>(0.05)                      | -0.31<br>(0.25)             | -0.39<br>(0.15)             |
| Dark grey shades further indicate p<0.05, and light gray p=0.05-0.10. SFA = saturated fatty acids. PUFA = unsaturated fatty acids.                                         |                                             |                       |                                  |                          |                                  |                          |                                     |                          |                              |                                      |                             |                             |

| Supplementary Table S10: Correlation coefficients (r) between selected dietary components and relative abundance of selected bacteria on phylum, family and species levels. |                                             |                       |                                  |                          |                                  |                          |                                     |                          |                              |                                      |                             |                  |
|-----------------------------------------------------------------------------------------------------------------------------------------------------------------------------|---------------------------------------------|-----------------------|----------------------------------|--------------------------|----------------------------------|--------------------------|-------------------------------------|--------------------------|------------------------------|--------------------------------------|-----------------------------|------------------|
|                                                                                                                                                                             | Recomm.<br>protein<br>intake (%<br>day) (p) | SFA<br>(g/day)<br>(p) | PUFA<br>(% en.<br>intake)<br>(p) | Fibres<br>(g/day)<br>(p) | Vitamin<br>D<br>(mcg/day)<br>(p) | Sodium<br>(g/day)<br>(p) | All<br>vegetables<br>(g/day)<br>(p) | Sweets<br>(g/day)<br>(p) | Flavones<br>(mcg/day)<br>(p) | Antho-<br>cyanin<br>(mcg/day)<br>(p) | Alcohol<br>(g/day)          | Potato<br>(g/dy) |
| PHYLUM LEVEL                                                                                                                                                                |                                             |                       |                                  |                          |                                  |                          |                                     |                          |                              |                                      |                             |                  |
| Actinobacteria                                                                                                                                                              | -0.32<br>(0.23)                             | 0.02<br>(0.94)        | -0.21<br>(0.45)                  | 0.13<br>(0.63)           | -0.12<br>(0.67)                  | 0.39<br>(0.15)           | 0.67<br>( <b>&lt;0.01</b> )         | -0.35<br>(0.19)          | 0.11<br>(0.69)               | 0.14<br>(0.63)                       | 0.09<br>(0.72)              | 0.11<br>(0.69)   |
| Firmicutes                                                                                                                                                                  | -0.03<br>(0.90)                             | -0.28<br>(0.31)       | -0.01<br>(0.96)                  | -0.07<br>(0.81)          | -0.06<br>(0.82)                  | -0.11<br>(0.68)          | 0.36<br>(0.18)                      | -0.33<br>(0.23)          | 0.36<br>(0.19)               | 0.52<br>(0.04)                       | 0.52<br>(0.046)             | 0.29<br>(0.29)   |
| Bacteroidetes                                                                                                                                                               | 0.07<br>(0.80)                              | 0.25<br>(0.37)        | 0.07<br>(0.81)                   | 0.05<br>(0.86)           | 0.11<br>(0.71)                   | 0.04<br>(0.89)           | -0.46<br>(0.08)                     | 0.35<br>(0.20)           | -0.35<br>(0.19)              | -0.46<br>(0.08)                      | -0.51<br>(0.05)             | -0.26<br>(0.35)  |
| Proteobacteria                                                                                                                                                              | 0.10<br>(0.71)                              | 0.32<br>(0.25)        | -0.06<br>(0.82)                  | -0.05<br>(0.86)          | -0.20<br>(0.47)                  | 0.07<br>(0.79)           | <0.01<br>(0.99)                     | 0.32<br>(0.25)           | -0.16<br>(0.57)              | -0.43<br>(0.11)                      | -0.18<br>(0.52)             | -0.09<br>(0.73)  |
| FAMILY LEVEL                                                                                                                                                                |                                             |                       |                                  |                          |                                  |                          |                                     |                          |                              |                                      |                             |                  |
| <i>Prevotellaceae</i>                                                                                                                                                       | 0.33<br>(0.23)                              | 0.39<br>(0.14)        | -0.28<br>(0.31)                  | 0.04<br>(0.88)           | -0.15<br>(0.60)                  | 0.38<br>(0.16)           | -0.24<br>(0.38)                     | 0.47<br>(0.08)           | -0.15<br>(0.59)              | -0.37<br>(0.17)                      | -0.13<br>(0.66)             | -0.24<br>(0.44)  |
| <i>Bacteroidaceae</i>                                                                                                                                                       | -0.30<br>(0.28)                             | -0.11<br>(0.69)       | 0.53<br>(0.04)                   | 0.07<br>(0.79)           | 0.69<br>( <b>&lt;0.01</b> )      | -0.16<br>(0.58)          | -0.38<br>(0.16)                     | 0.02<br>(0.93)           | -0.20<br>(0.46)              | -0.02<br>(0.93)                      | -0.47<br>(0.08)             | -0.16<br>(0.56)  |
| <i>Bifidobacteriaceae</i>                                                                                                                                                   | -0.35<br>(0.19)                             | 0.24<br>(0.39)        | <0.01<br>(0.99)                  | 0.27<br>(0.33)           | 0.17<br>(0.54)                   | 0.40<br>(0.14)           | 0.39<br>(0.15)                      | -0.21<br>(0.45)          | -0.14<br>(0.61)              | 0.22<br>(0.41)                       | -0.23<br>(0.41)             | 0.24<br>(0.38)   |
| <i>Clostridiales</i>                                                                                                                                                        | -0.36<br>(0.19)                             | 0.07<br>(0.79)        | 0.35<br>(0.19)                   | -0.23<br>(0.40)          | 0.23<br>(0.41)                   | -0.04<br>(0.88)          | -0.27<br>(0.33)                     | 0.06<br>(0.83)           | -0.11<br>(0.70)              | 0.19<br>(0.49)                       | -0.02<br>(0.95)             | 0.24<br>(0.39)   |
| <i>Lactobacillaceae</i>                                                                                                                                                     | -0.08<br>(0.77)                             | -0.08<br>(0.76)       | -0.14<br>(0.61)                  | -0.19<br>(0.49)          | 0.12<br>(0.68)                   | 0.05<br>(0.85)           | 0.24<br>(0.39)                      | -0.03<br>(0.92)          | 0.53<br>(0.04)               | -0.05<br>(0.87)                      | 0.67<br>( <b>&lt;0.01</b> ) | -0.21<br>(0.48)  |
| <i>Akkermansiaceae</i>                                                                                                                                                      | -0.14<br>(0.62)                             | -0.07<br>(0.79)       | -0.21<br>(0.45)                  | 0.14<br>(0.62)           | -0.18<br>(0.51)                  | 0.35<br>(0.19)           | 0.20<br>(0.47)                      | -0.37<br>(0.17)          | 0.32<br>(0.24)               | -0.17<br>(0.54)                      | 0.19<br>(0.48)              | -0.37<br>(0.17)  |

[illegible]
